# Supplementary material for: Closing the Organofluorine Mass Balance in Marine Mammals Using Suspect Screening and Machine Learning-Based Quantification
Source: PubMed Central journal article supplement (PMC10851419; doi:10.1021/acs.est.3c07220), 2024-01-25
Supplement: es3c07220_si_001.pdf [file es3c07220_si_001.pdf]

## Supporting Information

### **Closing the organofluorine mass balance in marine mammals using suspect screening and machine learning-based quantification**

Mélanie Z. Lauria,<sup>1\*</sup> † Helen Sepman,<sup>1,2†</sup> Thomas Ledbetter,<sup>1,2</sup> Merle Plassmann,<sup>1</sup> Anna M. Roos,<sup>3</sup> Malene Simon,<sup>4</sup> Jonathan P. Benskin,<sup>1\*#</sup> Anneli Kruve<sup>1,2#</sup>

<sup>1</sup>Department of Environmental Science, Stockholm University, Svante Arrhenius Väg 8, 10691 Stockholm, Sweden

<sup>2</sup>Department of Materials and Environmental Chemistry, Stockholm University, Svante Arrhenius Väg 16, 106 91, Stockholm, Sweden

<sup>3</sup>Department of Environmental Research and Monitoring, Swedish Museum of Natural History, 104 05 Stockholm, Sweden

<sup>4</sup>Greenland Climate Research Centre, Greenland Institute of Natural Resources, 3900 Nuuk, Greenland

\*Corresponding authors:

[Melanie.Lauria@aces.su.se](mailto:Melanie.Lauria@aces.su.se)

[Jon.Benskin@aces.su.se](mailto:Jon.Benskin@aces.su.se)

†MZL and HS contributed equally and share first authorship.

#AK and JPB contributed equally and share last authorship.

## Table of Contents

Table S1: Detailed information on the individual marine mammals sampled.

Table S2: Information for targeted PFAS and isotopically labelled internal standards, recovery and limits of quantification.

Table S3: Eluent information for the ion chromatography part of the EOF analysis by CIC.

Table S4: Inclusion list for suspect screening.

Table S5: The variable importance of 10 most influential PaDEL descriptors in the final model.

Table S6: All target PFAS with homologue series chemicals with  $-CF_2-$  difference.

Table S7: All target PFAS with homologue series chemicals with  $-C_2F_4-$  difference.

Table S8: Targets concentrations.

Table S9: Extractable Organofluorine (EOF) concentrations.

Table S10: Suspects predicted concentrations.

Table S11: Fluorine mass balance calculations: known and unknown EOF.

Figure S1: Schematic of sample preparation for fluorine mass balance determination.

Figure S2: Comparison between quantification with a homologue series compound of  $-C_2F_4-$  difference compared to model approach.

Figure S3: PFAS profiles in marine mammal liver samples.

Figure S4: Extracted Ion Chromatograms of perfluorocarboxylic acids (PFCAs) in liver sample of Swedish dolphin (SD3).

Figure S5: Extracted Ion Chromatograms of perfluorosulfonic acids (PFSAs) in liver sample of Swedish dolphin (SD2).

Figure S6: Extracted Ion Chromatograms of n:3 fluorotelomer carboxylic acids (n:3 FTCAs) in liver sample of Swedish dolphin (SD2).

Figure S7: MS<sup>2</sup> of 7:3 FTCA and 9:3 FTCA in Swedish dolphin liver (SD2).

Figure S8: Extracted Ion Chromatograms of fluorotelomer sulfonic acids (FTSAs) in liver sample of Swedish dolphin (SD2).

Figure S9: MS<sup>2</sup> of 10:2 FTSA in liver of Swedish Dolphin (SD2).

Figure S10: Extracted Ion Chromatograms of fluoroalkane sulphonamides (FASAs) in liver sample of Swedish dolphin (SD1).

Figure S11: MS<sup>2</sup> of FASAs in liver of Swedish Dolphin (SD1 to 3).

Figure S12: Extracted Ion Chromatograms of Cl-PFCAs in liver sample of Greenlandic pilot whale (PW3).

Figure S13 : Cl-PFNA isotopes in pilot whale liver sample (PW1).

Figure S14: Extracted Ion Chromatograms of ether-PFSAs in liver sample of Swedish dolphin (SD2).

Figure S15: Extracted Ion Chromatograms of unknown homologue C<sub>n</sub>F<sub>2n-9</sub>H<sub>9</sub>NO<sub>4</sub>SH class in liver sample of Swedish dolphin (SD2).

Figure S16: MS<sup>2</sup> of [C<sub>13</sub>F<sub>17</sub>H<sub>9</sub>NO<sub>4</sub>S]<sup>-</sup> in liver samples of SD2 and SD3.

Figure S17: Target and model quantification in three spiked liver samples.

Figure S18: Predicted concentration in pg/ul for different isomers of Cl-PFNA.

Figure S19: Predicted concentration in pg/ul for different isomers of ether-PFOS.

Figure S20: Model application domain.

## Chemical and reagents

Acetonitrile ( $\geq 99\%$ , Chromasolv™) was from Honeywell (France). Envicarb (Supelclean™) came from Sigma Aldrich. Stainless steel beads came from Next Advance©. Argon and oxygen gases used during CIC analysis were of purity grade 5.0 milliq, and fluoride standard (1000 mg/L) was from Thermo Scientific. Water was purified with a Millipore purification system that had a resistance of  $<18$  M $\Omega$ /cm (Milli-Q water). Ammonium acetate and methanol (99.8%, LiChrosolv®) were from Merck (Darmstadt, Germany).

## Sample preparation for organofluorine mass balance

Approximately 0.5 g of liver was fortified with 4 ml of acetonitrile together with 7-8 beads (stainless steel  $\varnothing$  4.8 mm) and homogenized in a bead blender (SPEX SamplePrep 1600 MiniG®) for 5 min at 1500 rpm. Samples were then centrifuged at 2000 rpm for 5 min (Centrifuge 5810, Eppendorf, Hamburg), and the supernatant was transferred to a new 13 mL PP tube. The extraction was repeated by adding another 4 mL of acetonitrile, vortexing and centrifuging again. The new supernatant was added to the existing tube containing the previous supernatant. Combined extracts were concentrated to 1 mL under a stream of nitrogen in a water bath at 40 °C (TurboVap LV Evaporator, Biotage). Concentrated extracts were then weighed and added to a 1.7 ml Eppendorf tube containing 25 mg EnviCarb and 50  $\mu$ l acetic acid. The samples were vortexed and centrifuged for 10 min at 10 000 rpm (Galaxy 14D, Microcentrifuge, VWR), then split into two aliquots of 250 uL each:

**Aliquot 1:** 250 uL of supernatant destined for UPLC-HRMS analysis was transferred to another Eppendorf tube and spiked with 1 ng of IS mix. 250  $\mu$ l of NH<sub>4</sub>OAc (4 mM in water) was added to the extracts as a buffer, vortexed and stored at -20 °C. Upon analysis, extracts were adjusted to room temperature, vortexed, and transferred to LC vials.

**Aliquot 2:** 250 uL of supernatant destined for CIC analysis was transferred to another Eppendorf tube and stored at -20 °C. ISs are not added to this aliquot since the fluorine in the isotopically labelled standards would influence the results. Upon analysis, extracts were adjusted to room temperature, and vortexed if needed.

### **Extractable organofluorine analysis**

EOF measurements were carried out with a Thermo-Mitsubishi CIC using a previously described method. Extracts (200  $\mu\text{L}$  per sample) were transferred into ceramic containers (“boats”) which contained glass wool for fluid dispersion. Boats were prebaked prior to analysis after being cleaned with soap, water and a basic solution. Samples were combusted slowly in a horizontal furnace (HF-210, Mitsubishi) at  $1100^{\circ}\text{C}$  under a flow of oxygen (400  $\text{mL}/\text{min}$ ), argon (200  $\text{mL}/\text{min}$ ), and water vapor mixed with argon (100  $\text{mL}/\text{min}$ ) for 5 minutes. Combustion gases were absorbed by MilliQ water during the combustion process with a gas absorber unit (GA-210, Mitsubishi). 200  $\mu\text{L}$  of the absorption solution was then injected onto an ion chromatograph (Dionex Integration HPIC, Thermo Fisher Scientific) equipped with an anion exchange column (2 x 50 mm guard column (Dionex IonPac AS19-4 $\mu\text{m}$ ) and 2 x 250 mm analytical column (Dionex IonPac AS19-4 $\mu\text{m}$ ) operated at  $35^{\circ}\text{C}$ . A gradient of aqueous hydroxide mobile phase was ramped from 8mM to 100 mM at 0.25  $\text{mL}/\text{min}$  (Table S3) and fluoride was detected using a conductivity detector.

A standard calibration curve was prepared with a range of 0.05 to 100  $\mu\text{g F}/\text{mL}$  and subsequently used for quantification within the linear range ( $R^2 > 0.97$ ). Mean fluoride concentration from procedural blanks was subtracted from samples before quantification. Boats were prebaked prior to analysis after being cleaned with soap, water and a basic solution.

Method detection limit (MDL) was calculated using the standard deviation of F concentrations from procedural blanks ( $n=3$ , each batch).

### **Target and suspect screening analysis**

Sample extracts (5  $\mu\text{L}$ ) were injected onto a Dionex Ultimate 3000 RS UHPLC system (Thermo Scientific) equipped with an ethylene bridge hybrid (BEH)  $\text{C}_{18}$  column was used (1.7  $\mu\text{m}$ , 50 x 2.1 mm, Waters). Mobile phase A consisted of 90%  $\text{H}_2\text{O}$  with 10% acetonitrile, mobile phase B consisted of 99% acetonitrile and 1%  $\text{H}_2\text{O}$ , both with ammonium acetate at 2 mM (0.1542 g/L). The following gradient elution program was used at a flowrate of 0.4  $\text{mL}/\text{min}$ : 0-0.5 minutes, 10% B; 0.5-8 minutes, 80% B; 8-8.1 minutes, 100% B; 8.1-11 minutes, 100% B; 11-11.1 minutes, 10% B; 11.1-13 minutes, 10% B. The autosampler sample tray was cooled to  $15^{\circ}\text{C}$  and the column temperature was  $30^{\circ}\text{C}$ .

A Q-Exactive™ ultra high mass resolution (UHMR) hybrid Quadrupole-Orbitrap™ mass spectrometer was used with alternating Full Scan (FS) Data-Dependent (DD) MS<sup>2</sup> mode. In FS the scan range was 200-1800 *m/z* in resolution was 120 000 using the full width at half maximum definition for an *m/z* of 200. The Automatic Gain Control (AGC) target was 3 x 10<sup>6</sup>. Maximum inject time was 250 ms. Electrospray ionization settings were set to negative mode, sheath gas flowrate was 30 arbitrary units (AU), aux gas flowrate was 10 AU, sweep gas flowrate was 0 AU, spray voltage was 3.7 kV, capillary temp was 350 °C, S-lens RF level was 50 AU, and aux gas heater temp was 350 °C.

For each analyte, the concentration of the lowest calibration standard with at least a 10000 counts per second (cps) and signal to noise ratio higher than 3 was used as the method limit of quantification (method LOQ). The mean extract volume ( $\overline{extract} = 1045.8 \text{ uL}$ ) and mean sample mass ( $\overline{sample\ mass} = 0.54 \text{ g}$ ) were used to determine the LOQ in liver samples.

$$LOQ \left( \frac{ng}{g} \right) = cal_{lowest} \left( \frac{ng}{\mu l} \right) \cdot \frac{\overline{extract}(\mu l)}{\overline{sample\ mass}(g)} \quad (eq. 1)$$

If a compound was found to be present in the blanks, its concentration in blanks plus three times the standard deviation in the blanks was used in place of the concentration in the lowest suitable calibration level to determine the LOQ with equation (1).

### Confidence levels

Confidence Levels (CLs) were assigned to suspects according to the scale proposed by Schymanski et al (see overview in the SI).<sup>23</sup> Briefly, CL 1 is a confirmed structure by comparison with a reference analytical standard, CL 2 is a probable structure and it is subdivided in CL 2a, which is assigned when the MS<sup>2</sup> is matched with literature or a library, and CL 2b, which in this study has been assigned to those suspects that are part of homologue series for which retention times increase with increasing chain length, but none or only a few fragments are observed. CL 3 is a tentative candidate for which one or more possible structures are proposed. CL 4 refers to a unequivocal molecular formula and CL 5 to and exact *m/z* of interest.

## Quality control

A suite of QC procedures was included to ensure the accuracy and precision of EOF and target PFAS data, including spiked liver (with native PFAS and inorganic fluorine, both  $n=3$ ), procedural blanks ( $n=3$ ), and analysis of certified reference materials (CRM,  $n=3$ ). In all cases, QC samples were analysed in the same manner as real samples and background subtraction (using unspiked liver for spiked liver samples experiments and procedural blanks for liver samples) was performed prior to calculations. Direct combustion (i.e. without extraction) of CRM BCR-461 (fluorine in clay) produced concentrations that were highly consistent with the reference value ( $579 \pm 84 \mu\text{g F/g}$ , certified  $568 \pm 60 \mu\text{g F/g}$ ), demonstrating accuracy and precision of the CIC method. The inorganic fluorine spike/recovery experiment, which involved subsamples (0.5 g) of liver prepared with and without a 250 ng NaF spike demonstrated effective removal of inorganic fluorine during extraction (average recovery 0%, RSD 11%), consistent with prior results using this method.<sup>10,24</sup> Finally, non-IS corrected recoveries of organofluorine (determined by CIC) and target PFAS (determined by LC-HRMS) using subsamples (0.5 g) of liver prepared with and without a 5 ng native PFAS mixture (equivalent to 155.7 ng of F) were largely acceptable (average recoveries of 83% [RSD 8%] for EOF by CIC and 80-150% for most targets by LC-HRMS). The exception was for a handful of targets measured by LC-HRMS (i.e. PFUnDA, PFHxDA, FTCAs, 4:2 and 8:2 FTSA, MeFOSA, EtFOSA and FOSAA) which displayed higher or lower recoveries, possibly due to a non-exactly matched internal standard or matrix suppression and enhancement processes. Detailed values can be found in Table S2, together with limits of quantification for targets.

## Cleaning of descriptor for modelling

First, all 1449 (1444 PaDEL and five eluent) descriptors were confirmed not to include more than 10 missing values per descriptor. Next, all descriptors with variance above a cut-off value of 80/20 (the ratio of first over second most common value) were removed, resulting in 796 descriptors. Lastly, the correlation between descriptors was calculated and for descriptors with a pair-wise correlation higher than 0.75, the descriptor with a higher mean absolute correlation was removed. The resulting 124 descriptors were used for further modelling.

**Table S1:** Detailed information on the marine mammals sampled. Empty cells indicate unknown information. NMR: Swedish museum of natural history; ACES: department of environmental science at Stockholm University, CITES: Convention on International Trade in Endangered Species of Wild Fauna and Flora.

|                                                           | <b>Name in paper</b> | <b>Greenland Nr</b> | <b>Date</b> | <b>Sex</b> | <b>Length (m)</b> | <b>Age</b> | <b>Organ</b> | <b>ACES nr</b> | <b>CITES Nr</b>     |
|-----------------------------------------------------------|----------------------|---------------------|-------------|------------|-------------------|------------|--------------|----------------|---------------------|
| <b>White beaked dolphins, Maniitsoq, West Greenland</b>   | GD1                  | La_88               | Fall 2018   | male       |                   |            | liver        | PAX20/0164     | 20GL1717529         |
|                                                           | GD2                  | La_89               | Fall 2018   | male       |                   |            | liver        | PAX20/0166     |                     |
|                                                           | GD3                  | La_90               | Fall 2018   | male       |                   |            | liver        | PAX20/0168     |                     |
|                                                           | GD4                  | La_92               | Fall 2018   | male       |                   |            | liver        | PAX20/0170     |                     |
|                                                           | GD5                  | La_93               | Fall 2018   | male       |                   |            | liver        | PAX20/0172     |                     |
| <b>Long-finned pilot whales, Tasiilaq, East Greenland</b> | PW1                  | Gm_01               | 2018-08-20  | female     | 4-5               | 18         | liver        | PAX20/0174     | 20GL1717532         |
|                                                           | PW2                  | Gm_02               | 2018-08-20  | female     | 4-5               | 9          | liver        | PAX20/0176     |                     |
|                                                           | PW3                  | Gm_10               | 2018-09-11  | female     | 3.8               |            | liver        | PAX20/0180     |                     |
|                                                           | PW4                  | Gm_11               | 2018-09-11  | female     | 4                 | 13         | liver        | PAX20/0182     |                     |
|                                                           | PW5                  | Gm_15               | 2018-09-11  | female     | 3-4               |            | liver        | PAX20/0184     |                     |
|                                                           | <b>Name in paper</b> | <b>NMR Nr</b>       | <b>Date</b> | <b>Sex</b> | <b>Length (m)</b> | <b>Age</b> | <b>Organ</b> | <b>ACES Nr</b> | <b>Locality</b>     |
| <b>White beaked dolphins, Sweden</b>                      | SD1                  | A2009/05048         | 2007-10-12  | female     | 2.7               | Adult, old | liver        | PAX20/0225     | Ängelholm, Skåne    |
|                                                           | SD2                  | A2009/05104         | 2009-02-01  |            | 1.5               | Juvenile   | liver        | PAX20/0227     | Kungsbacka, Halland |
|                                                           | SD3                  | A2015/05634         | 2008-01-28  | female     | 2                 |            | liver        | PAX20/0229     | Ängelholm, Skåne    |



**Table S2:** Information for targeted PFAS. Some compounds did not have a direct internal standard therefore internal standard with the closest possible structure was used. IS: internal standard, SD: standard deviation, LOQ: limit of quantification.

\* : indicates targets not found in any liver sample.

| Class             | Analyte                              | IS                                      | Recovery $\pm$ SD (%) | LOQ (ng/g) |
|-------------------|--------------------------------------|-----------------------------------------|-----------------------|------------|
| PFCAs             | PFPeA*                               | <sup>13</sup> C <sub>5</sub> -PFPeA     | 118 $\pm$ 1           | 0.155      |
|                   | PFHxA                                | <sup>13</sup> C <sub>2</sub> -PFHxA     | 97 $\pm$ 3            | 0.045      |
|                   | PFHpA                                | <sup>13</sup> C <sub>4</sub> -PFHpA     | 95 $\pm$ 1            | 0.045      |
|                   | PFOA                                 | <sup>13</sup> C <sub>4</sub> -PFOA      | 102 $\pm$ 3           | 0.047      |
|                   | PFNA                                 | <sup>13</sup> C <sub>5</sub> -PFNA      | 93 $\pm$ 12           | 0.047      |
|                   | PFDA                                 | <sup>13</sup> C <sub>2</sub> -PFDA      | 93 $\pm$ 15           | 0.047      |
|                   | PFUnDA                               | <sup>13</sup> C <sub>2</sub> -PFUnDA    | 48 $\pm$ 44           | 0.047      |
|                   | PFDoDA                               | <sup>13</sup> C <sub>2</sub> -PFDoDA    | 98 $\pm$ 12           | 0.047      |
|                   | PFTTrDA                              | <sup>13</sup> C <sub>2</sub> -PFDoDA    | 81 $\pm$ 56           | 0.047      |
|                   | PFTeDA                               | <sup>13</sup> C <sub>2</sub> -PFDoDA    | 146 $\pm$ 14          | 0.047      |
| PFHxDA*           | <sup>13</sup> C <sub>2</sub> -PFDoDA | 193 $\pm$ 4                             | 0.045                 |            |
| PFSAs             | PFBS*                                | <sup>18</sup> O <sub>2</sub> -PFHxS     | 106 $\pm$ 5           | 0.141      |
|                   | PFHxS                                | <sup>18</sup> O <sub>2</sub> -PFHxS     | 145 $\pm$ 6           | 0.149      |
|                   | PFOS                                 | <sup>13</sup> C <sub>4</sub> -PFOS      | 81 $\pm$ 24           | 0.043      |
|                   | PFDS                                 | <sup>13</sup> C <sub>4</sub> -PFOS      | 99 $\pm$ 5            | 0.153      |
| n:3 FTCAs         | 3:3 FTCA*                            | <sup>13</sup> C <sub>4</sub> -PFOA      | 42 $\pm$ 1            | 0.556      |
|                   | 5:3 FTCA                             | <sup>13</sup> C <sub>4</sub> -PFOA      | 56 $\pm$ 4            | 0.047      |
|                   | 7:3 FTCA                             | <sup>13</sup> C <sub>4</sub> -PFOA      | 66 $\pm$ 3            | 0.161      |
| n:2 FTSAAs        | 4:2 FTSA*                            | <sup>13</sup> C <sub>2</sub> -6:2 FTSA  | 42 $\pm$ 1            | 0.048      |
|                   | 6:2 FTSA*                            | <sup>13</sup> C <sub>2</sub> -6:2 FTSA  | 111 $\pm$ 1           | 0.048      |
|                   | 8:2 FTSA                             | <sup>13</sup> C <sub>2</sub> -6:2 FTSA  | 57 $\pm$ 2            | 0.048      |
| FASAs             | FOSA                                 | <sup>13</sup> C <sub>8</sub> -FOSA      | 93 $\pm$ 15           | 0.047      |
|                   | MeFOSA*                              | D <sub>3</sub> -MeFOSA                  | 155 $\pm$ 9           | 0.047      |
|                   | EtFOSA*                              | D <sub>5</sub> -EtFOSA                  | 175 $\pm$ 4           | 0.047      |
| FASAAs            | FOSAA*                               | D <sub>3</sub> -MeFOSAA                 | 157 $\pm$ 2           | 0.047      |
|                   | MeFOSAA*                             | D <sub>3</sub> -MeFOSAA                 | 100 $\pm$ 1           | 0.048      |
|                   | EtFOSAA*                             | D <sub>5</sub> -EtFOSAA                 | 90 $\pm$ 3            | 0.047      |
| diPAPs            | 6:2 diPAP*                           | <sup>13</sup> C <sub>4</sub> -6:2 diPAP | 96 $\pm$ 2            | 0.047      |
|                   | 6:2/8:2 diPAP*                       | <sup>13</sup> C <sub>4</sub> -6:2 diPAP | 83 $\pm$ 0.3          | 0.047      |
|                   | 8:2 diPAP*                           | <sup>13</sup> C <sub>4</sub> -8:2 diPAP | 98 $\pm$ 4            | 0.162      |
| Cl-PFESAs         | 9Cl-PF3ONS*                          | <sup>13</sup> C <sub>4</sub> -PFOS      | 93 $\pm$ 2            | 0.047      |
|                   | 11Cl-PF3OUdS*                        | <sup>13</sup> C <sub>4</sub> -PFOS      | 94 $\pm$ 4            | 0.047      |
| PFECAs            | ADONA*                               | <sup>13</sup> C <sub>4</sub> -PFOS      | 96 $\pm$ 3            | 0.047      |
| Recovery Standard |                                      | <sup>13</sup> C <sub>8</sub> -PFOA      |                       |            |
|                   |                                      | <sup>13</sup> C <sub>8</sub> -PFOS      |                       |            |

**Table S3:** Eluent information for the ion chromatography part of the EOF analysis by CIC.

| Time (min) | Concentration OH <sup>-</sup> (mM) |
|------------|------------------------------------|
| 0          | 8                                  |
| 9          | 8                                  |
| 11         | 100                                |
| 14         | 100                                |
| 14,1       | 8                                  |
| 20         | 8                                  |

**Table S4:** Inclusion list for suspect screening.

*Refer to accompanying Excel file.*

**Table S5:** The relative variable importance and details of the 10 most influential PaDEL descriptors for the final model based on combined training and test set data.

| Feature        | Relative importance | Descriptor class            | Description                                                                                                |
|----------------|---------------------|-----------------------------|------------------------------------------------------------------------------------------------------------|
| AATS6e         | 100.0               | Auto correlation descriptor | Average Broto-Moreau autocorrelation - lag 6 / weighted by Sanderson electronegativities                   |
| ASP-6          | 66.5                | ChiPath descriptor          | Average simple path, order 6                                                                               |
| VP-7           | 38.5                | ChiPath Descriptor          | Valence path, order 7                                                                                      |
| VR2_Dzi        | 36.7                | Barysz Matrix descriptor    | Normalized Randic-like eigenvector-based index from Barysz matrix / weighted by first ionization potential |
| BCUTw-11       | 35.0                | BCUT Descriptor             | high lowest atom weighted BCUTS                                                                            |
| ALogP          | 22.6                | ALOGP descriptor            | Ghose-Crippen LogKow                                                                                       |
| pH.aq.         | 22.0                | Eluent descriptor           | Aqueous pH                                                                                                 |
| VR2_Dzs        | 9.7                 | Barysz Matrix descriptor    | Normalized Randic-like eigenvector-based index from Barysz matrix / weighted by I-state                    |
| polarity_index | 9.7                 | Eluent descriptor           | Polarity index                                                                                             |
| GATS5c         | 9.3                 | Auto correlation descriptor | Geary autocorrelation - lag 5 / weighted by charges                                                        |

**Table S6:** All target PFAS with homologue series chemicals with -CF<sub>2</sub>- difference.

| Compound subject to quantification | Homologue series compound used in quantification | Smaller or larger by -CF <sub>2</sub> - |
|------------------------------------|--------------------------------------------------|-----------------------------------------|
| PFDA                               | PFNA                                             | smaller                                 |
|                                    | PFUnDA                                           | bigger                                  |
| PFDoDA                             | PFTTrDA                                          | bigger                                  |
|                                    | PFUnDA                                           | smaller                                 |
| PFHpA                              | PFHxA                                            | smaller                                 |
|                                    | PFOA                                             | bigger                                  |
| PFHxA                              | PFHpA                                            | bigger                                  |
|                                    | PFPeA                                            | smaller                                 |
| PFNA                               | PFDA                                             | bigger                                  |
|                                    | PFOA                                             | smaller                                 |
| PFOA                               | PFHpA                                            | smaller                                 |
|                                    | PFNA                                             | bigger                                  |
| PFPeA                              | PFHxA                                            | bigger                                  |
| PFTeDA                             | PFTTrDA                                          | smaller                                 |
| PFTTrDA                            | PFDoDA                                           | smaller                                 |
|                                    | PFTeDA                                           | bigger                                  |
| PFUnDA                             | PFDA                                             | smaller                                 |
|                                    | PFDoDA                                           | bigger                                  |

**Table S7:** All target PFAS with homologue series chemicals with -C<sub>2</sub>F<sub>4</sub>- difference.

| Compound subject to quantification | Homologue series compound used in quantification | Smaller or larger by -C <sub>2</sub> F <sub>4</sub> - |
|------------------------------------|--------------------------------------------------|-------------------------------------------------------|
| 11Cl-PF3OUdS                       | 9Cl-PF3ONS                                       | smaller                                               |
| 4:2 FTS                            | 6:2 FTS                                          | bigger                                                |
| 6:2 diPAP                          | 6:2/8:2 diPAP                                    | bigger                                                |
| 6:2 FTS                            | 4:2 FTS                                          | smaller                                               |
|                                    | 8:2 FTS                                          | bigger                                                |
| 6:2/8:2 diPAP                      | 6:2 diPAP                                        | smaller                                               |
|                                    | 8:2 diPAP                                        | bigger                                                |
| 8:2 diPAP                          | 6:2/8:2 diPAP                                    | smaller                                               |
| 8:2 FTS                            | 6:2 FTS                                          | smaller                                               |
| 9Cl-PF3ONS                         | 11Cl-PF3OUdS                                     | bigger                                                |
| 7:3 FTA                            | 5:3 FTA                                          | smaller                                               |
| 5:3 FTA                            | 7:3 FTA                                          | bigger                                                |
|                                    | 3:3 FTA                                          | smaller                                               |
| 3:3 FTA                            | 5:3 FTA                                          | bigger                                                |
| PFBS                               | PFHxS                                            | bigger                                                |
| PFDA                               | PFD <sub>o</sub> DA                              | bigger                                                |
|                                    | PFOA                                             | smaller                                               |
| PFD <sub>o</sub> DA                | PFDA                                             | smaller                                               |
|                                    | PFTeDA                                           | bigger                                                |
| PFDS                               | PFOS                                             | smaller                                               |
| PFHpA                              | PFNA                                             | bigger                                                |
|                                    | PFPeA                                            | smaller                                               |
| PFHxA                              | PFOA                                             | bigger                                                |
| PFHxDA                             | PFTeDA                                           | smaller                                               |
| PFHxS                              | PFBS                                             | smaller                                               |
|                                    | PFOS                                             | bigger                                                |
| PFNA                               | PFHpA                                            | smaller                                               |
|                                    | PFUnDA                                           | bigger                                                |
| PFOA                               | PFDA                                             | bigger                                                |
|                                    | PFHxA                                            | smaller                                               |

|         |         |         |
|---------|---------|---------|
| PFOS    | PFDS    | bigger  |
|         | PFHxS   | smaller |
| PFPeA   | PFHpA   | bigger  |
| PFTeDA  | PFDODA  | smaller |
|         | PFHxDA  | bigger  |
| PFTriDA | PFUnDA  | smaller |
| PFUnDA  | PFNA    | smaller |
|         | PFTriDA | bigger  |

**Table S8:** Target concentrations in ng/g, sum of targets concentrations ( $\sum$ PFAS (ng/g)), targets concentrations in fluorine equivalents and sum of targets concentrations in fluorine equivalents ( $\sum$ FPFAS (ng F/g)).

*Refer to accompanying Excel file.*

**Table S9:** Extractable organofluorine concentrations in ng F/g.

*Refer to accompanying Excel file.*

**Table 10:** Suspects concentrations in ng/g, sum of suspects concentrations ( $\sum$ Suspects (ng/g)), Suspects concentrations in ng F/g and sum of suspects concentrations in fluorine equivalents ( $\sum$ <sub>F</sub>Suspects (ng F/g)).

*Refer to accompanying Excel work book.*

**Table S11:** Fluorine mass balance calculations: known and unknown EOF.

*Refer to accompanying Excel work book.*

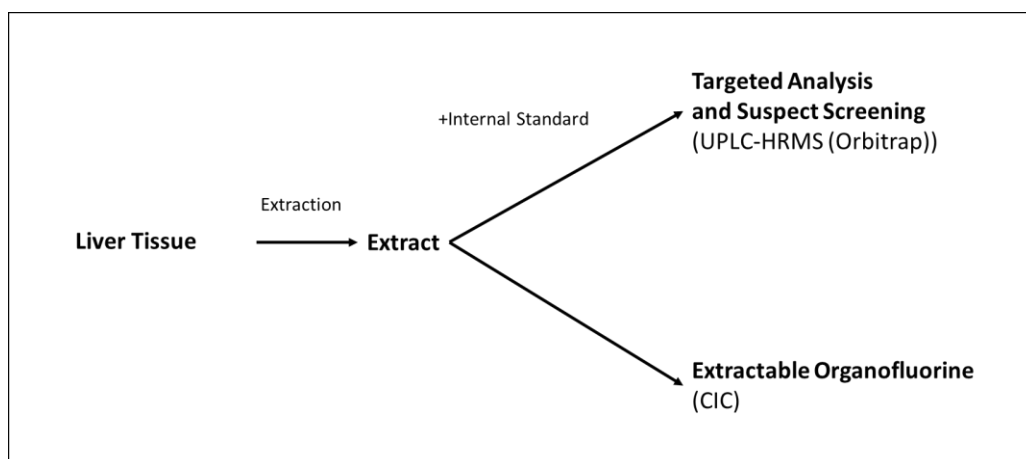

**Figure S1:** Schematic of sample preparation for fluorine mass balance determination.

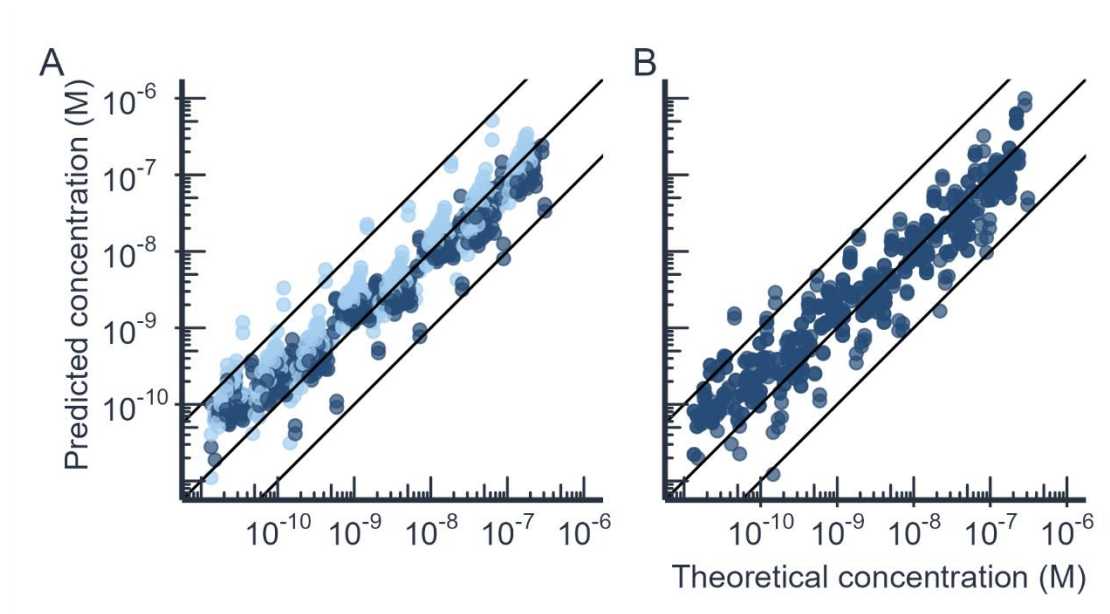

**Figure S2:** Comparison between quantification with A) a homologue of  $-C_2F_4-$  unit smaller (light blue) or larger (dark blue) compared to respective suspect and B) concentration estimations using predicted ionization efficiency for the same set of chemicals with leave-one-out approach. The mean fold errors in concentrations were 2.6 and 3.1 when smaller or larger homologue was used for quantification, respectively. The mean fold error for quantification with model was 2.7 compared to mean fold error over all homologues of 2.8. The difference between quantification with model compared to using a homologue series approach was statistically insignificant (Wilcoxon signed rank test;  $p = 0.26$ ). Similarly, the 10 target PFAS in a homologue series with difference in one  $-CF_2-$  unit resulted in a mean fold concentration error of  $2.2\times$ , while the  $\log IE$  modelling approach had a mean fold concentration error of  $2.5\times$ . The quantification with a smaller homologue (fold error of  $2.2\times$ ) and larger homologue (fold error of  $2.3\times$ ) performed essentially the same (Figure 4E and 4F).

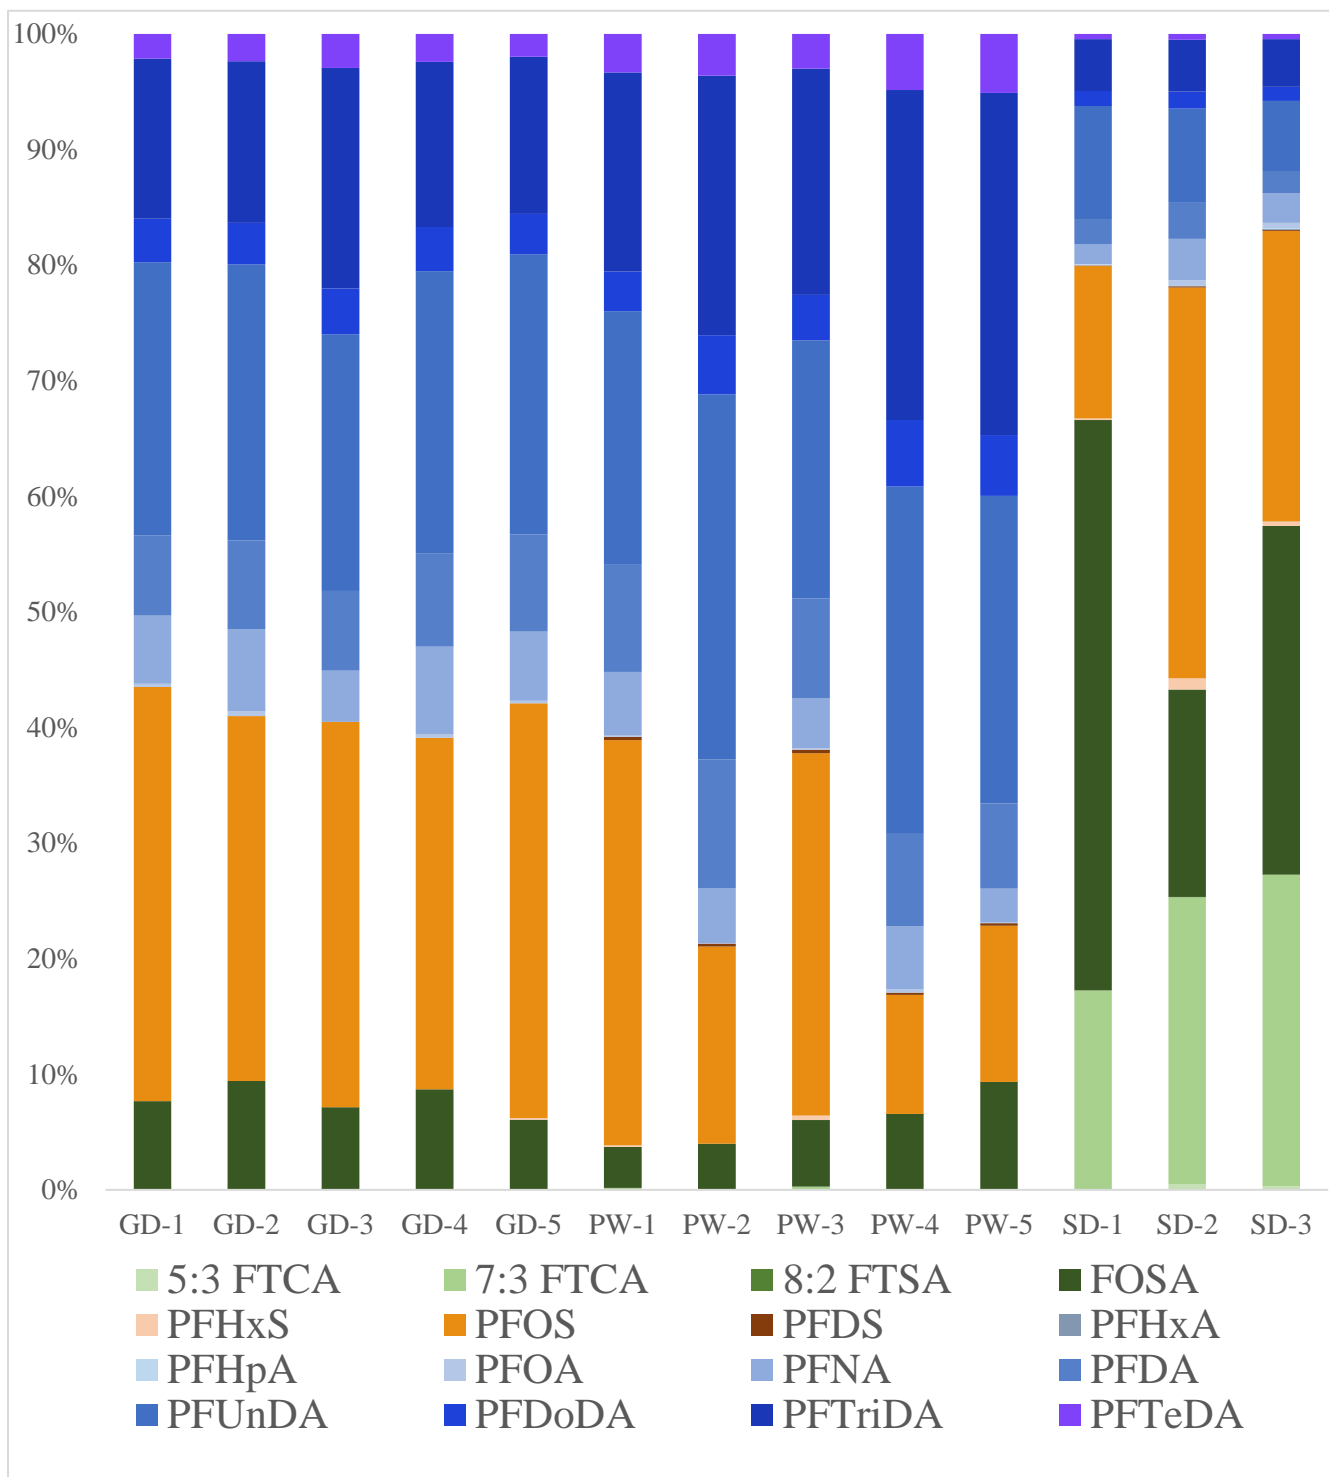

**Figure S3:** PFAS profiles in marine mammal liver samples. GD: Greenlandic dolphins, PW: Greenlandic pilot whales, SD: Swedish dolphins. Profiles are similar among all samples, with the notable difference of 7:3 FTCA being present only in SD as well as FOSA having a higher percentage in these samples.

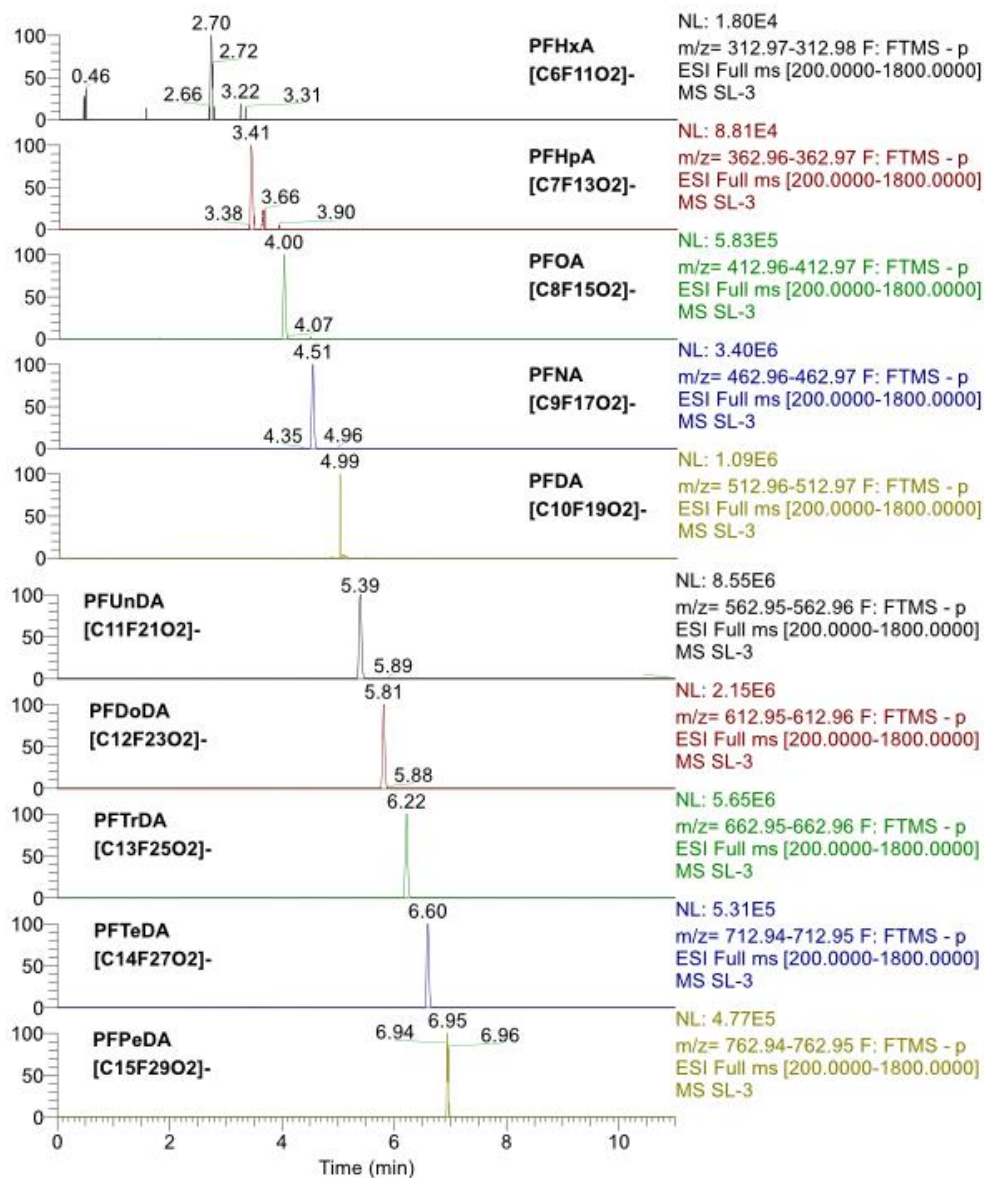

**Figure S4:** Extracted Ion Chromatograms of perfluorocarboxylic acids (PFCAs) in liver sample of Swedish dolphin (SD3).



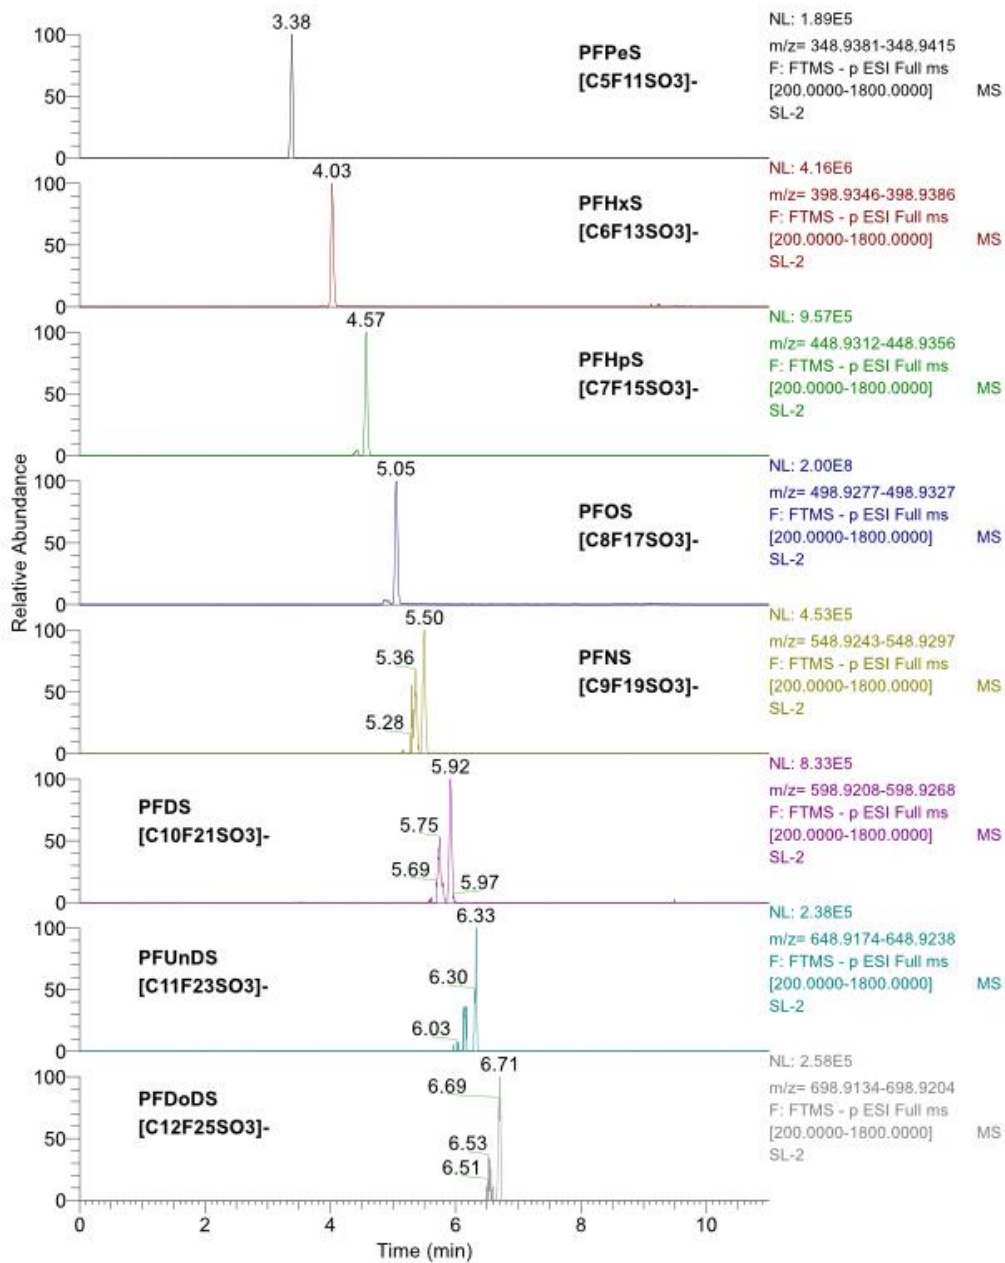

**Figure S5:** Extracted Ion Chromatograms of perfluorosulfonic acids (PFSAs) in liver sample of Swedish dolphin (SD2).

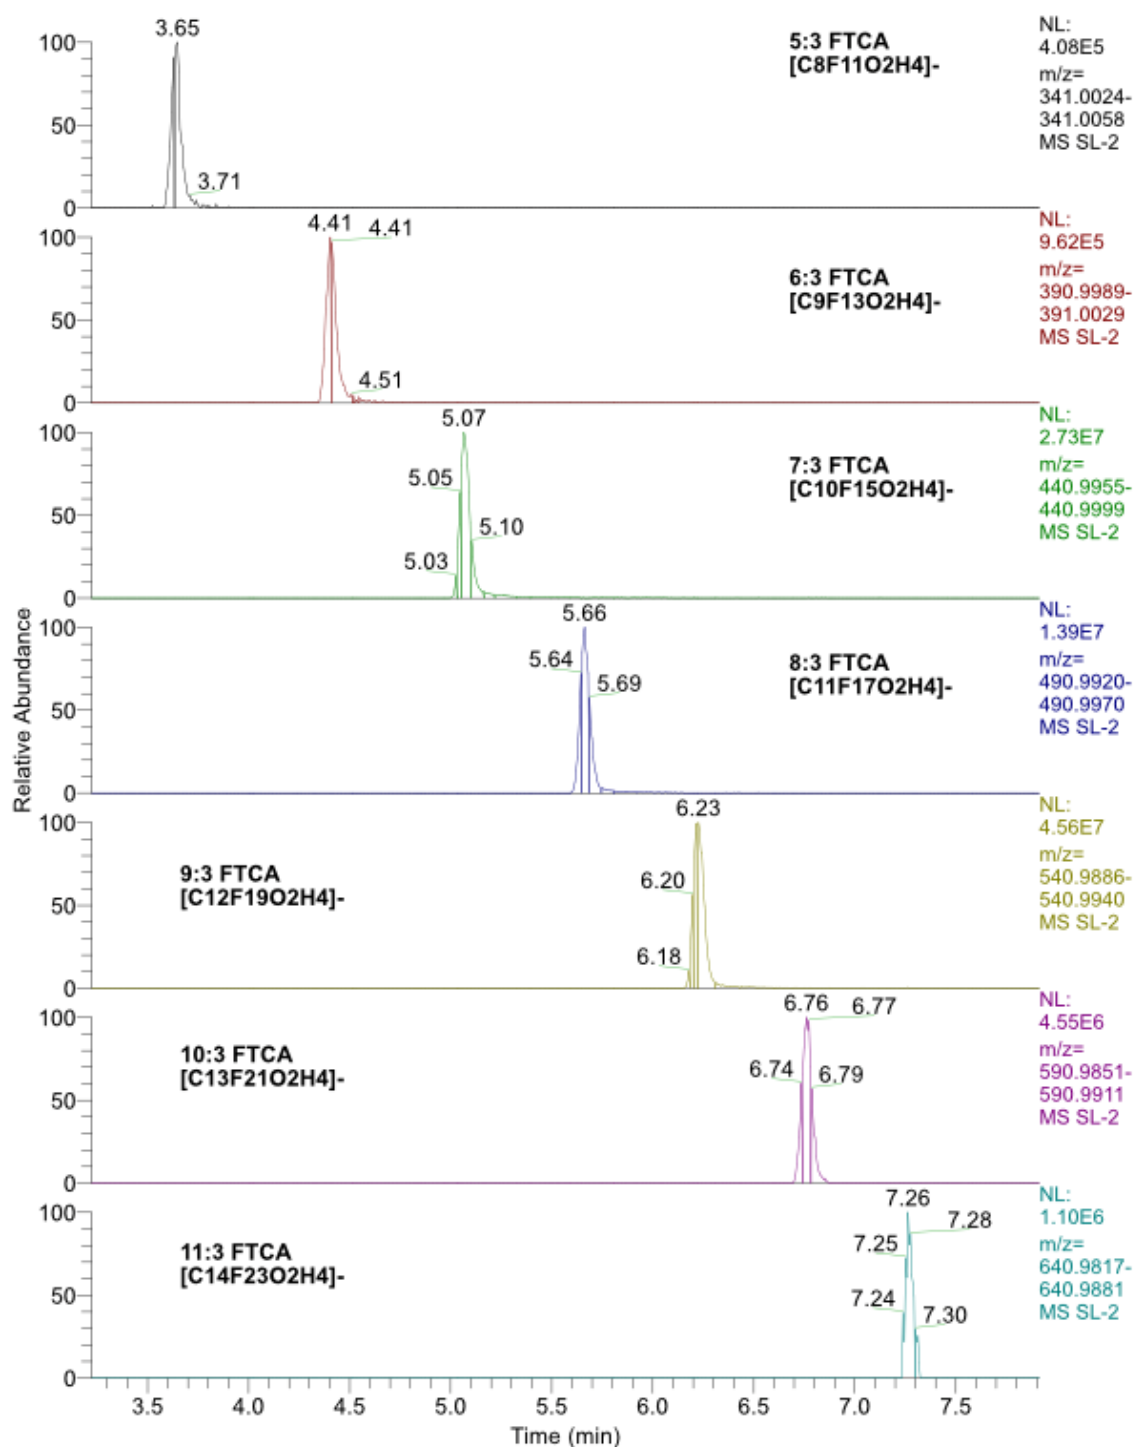

**Figure S6:** Extracted Ion Chromatograms of n:3 fluorotelomer carboxylic acids (n:3 FTCAs) in liver sample of Swedish dolphin (SD2). Single scan dropouts are due to the triggering of MS/MS scans.

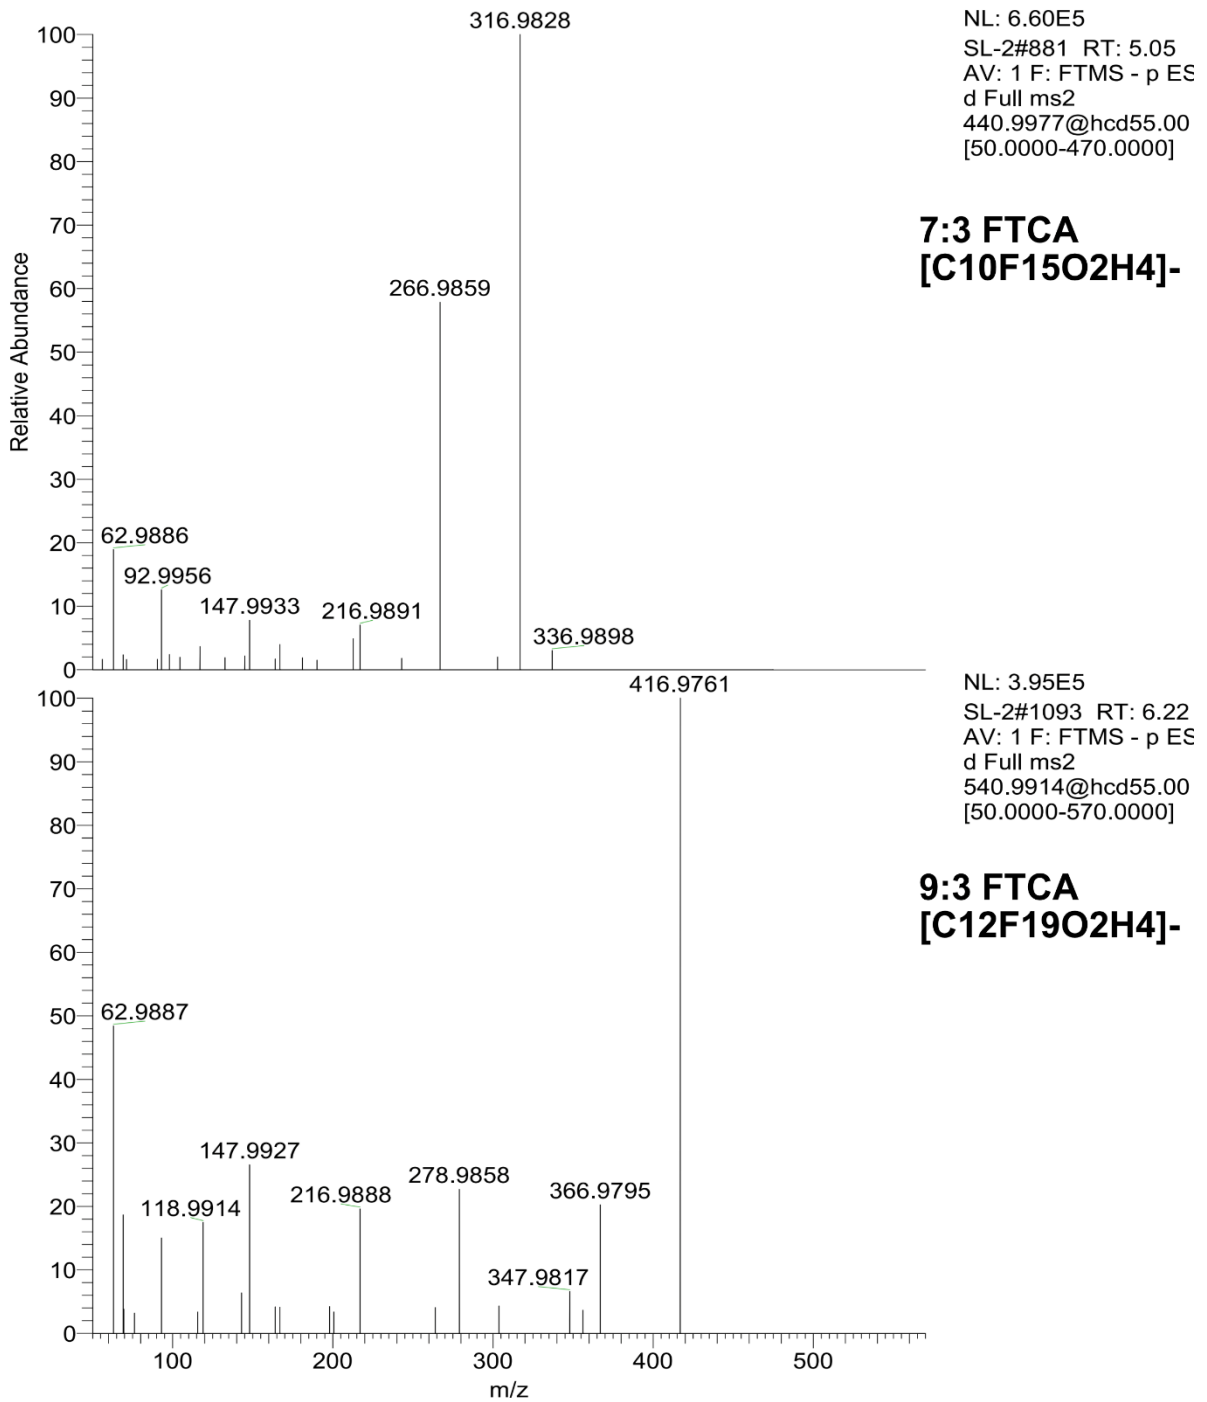

**Figure S7:** MS<sup>2</sup> of 7:3 FTCA and 9:3 FTCA in Swedish dolphin liver (SD2).

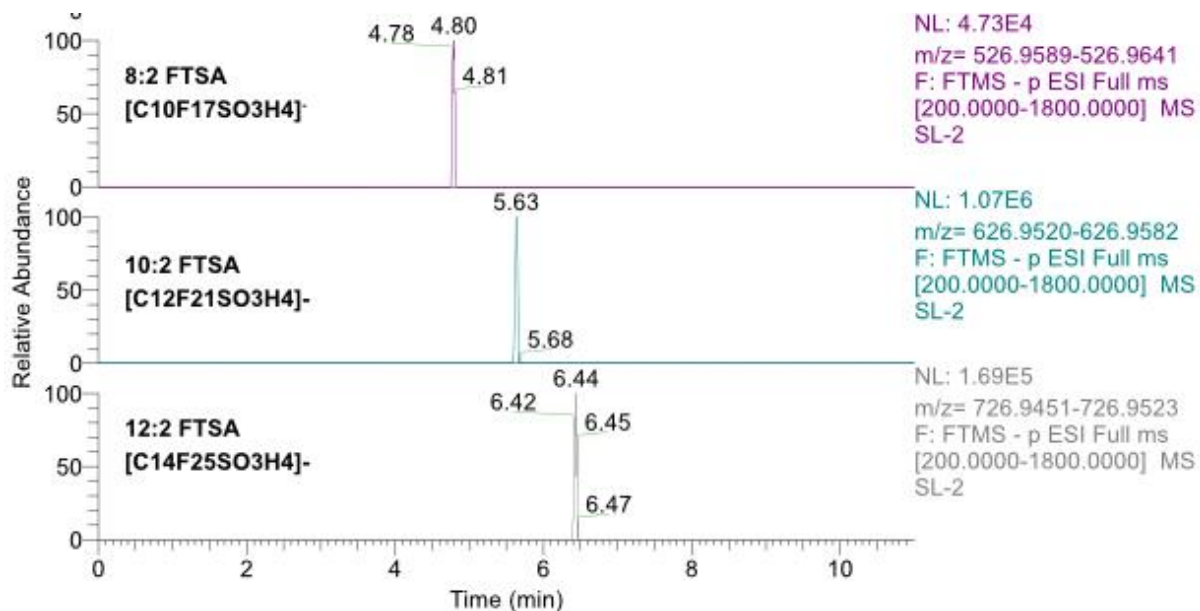

**Figure S8:** Extracted Ion Chromatograms of fluorotelomer sulfonic acids (FTSAs) in liver sample of Swedish dolphin (SD2).

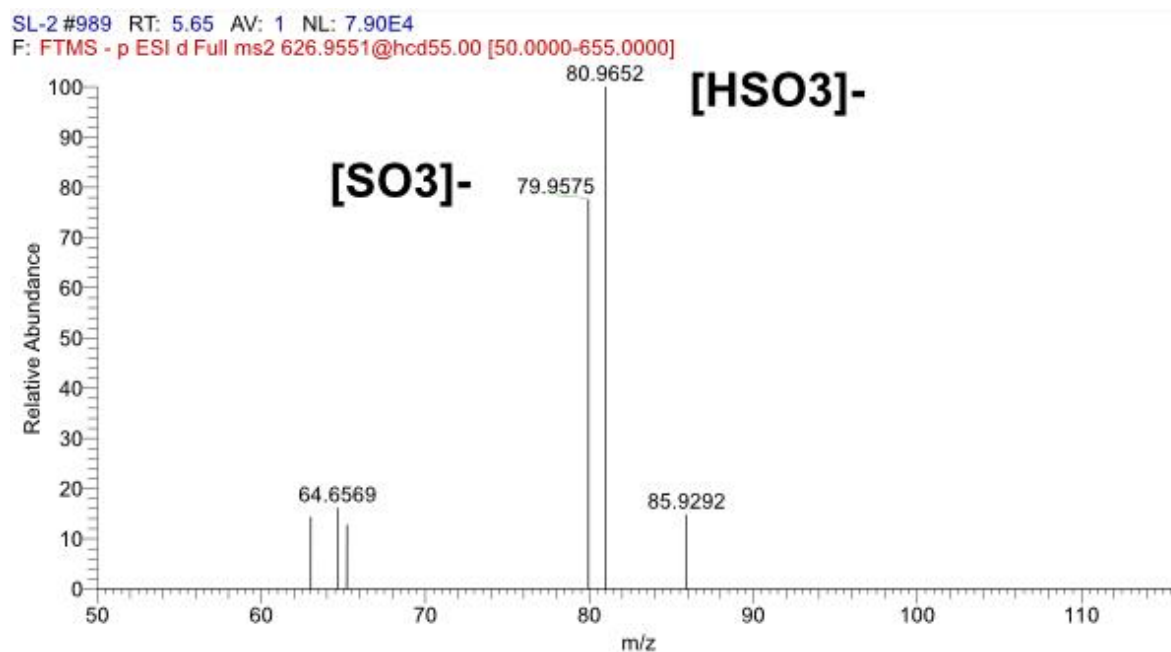

**Figure S9:** MS<sup>2</sup> of 10:2 FTSA in liver of Swedish Dolphin (SD2).

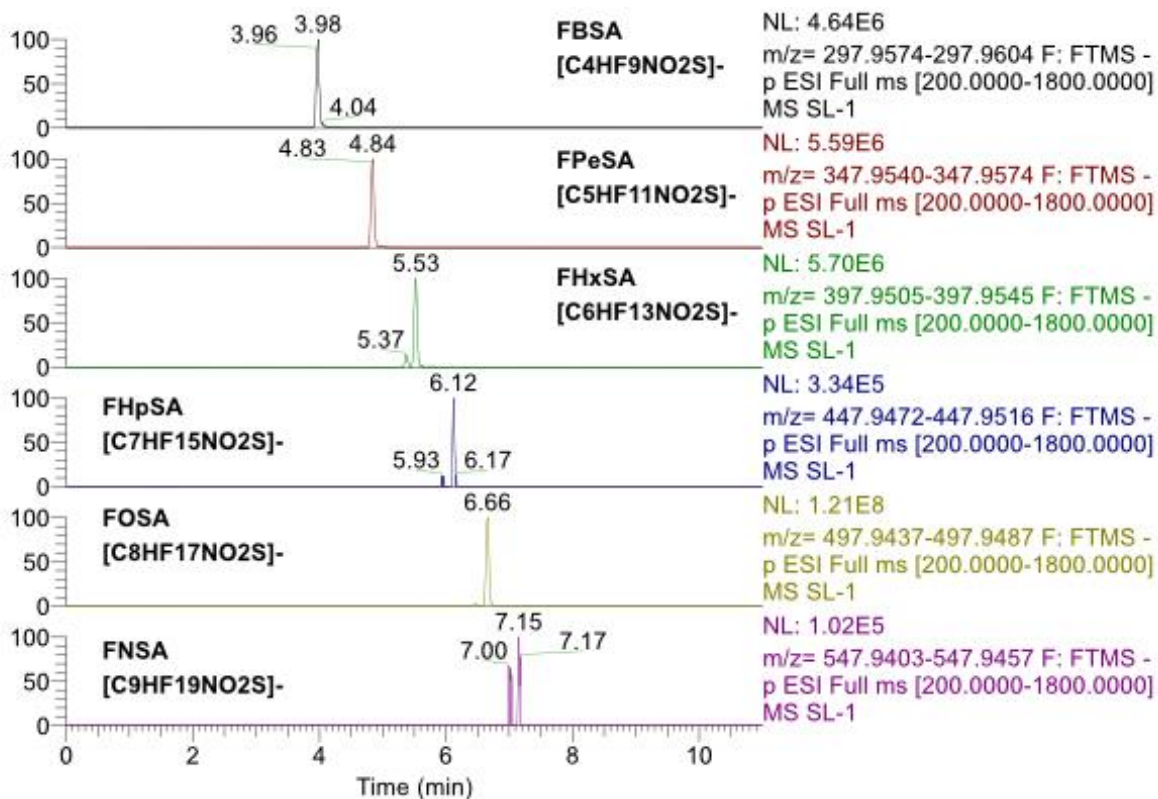

**Figure S10:** Extracted Ion Chromatograms of fluoroalkane sulphonamides (FASAs) in liver sample of Swedish dolphin (SD1).

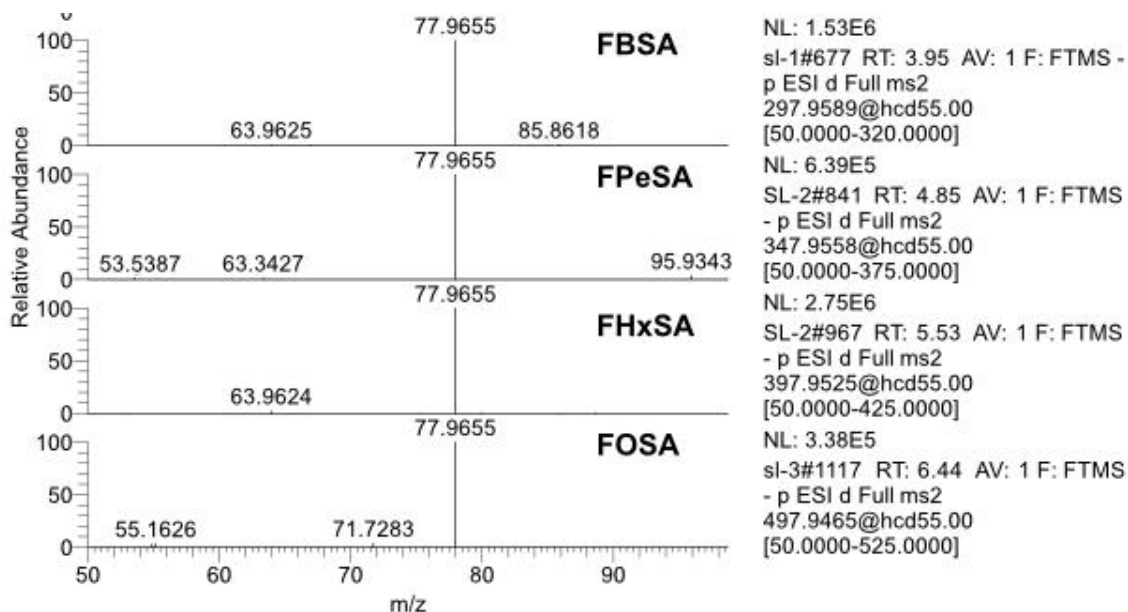

**Figure S11:** MS<sup>2</sup> of FASAs in liver of Swedish Dolphin (SD1 to 3). With characteristic [NSO<sub>2</sub>]<sup>-</sup> fragment.

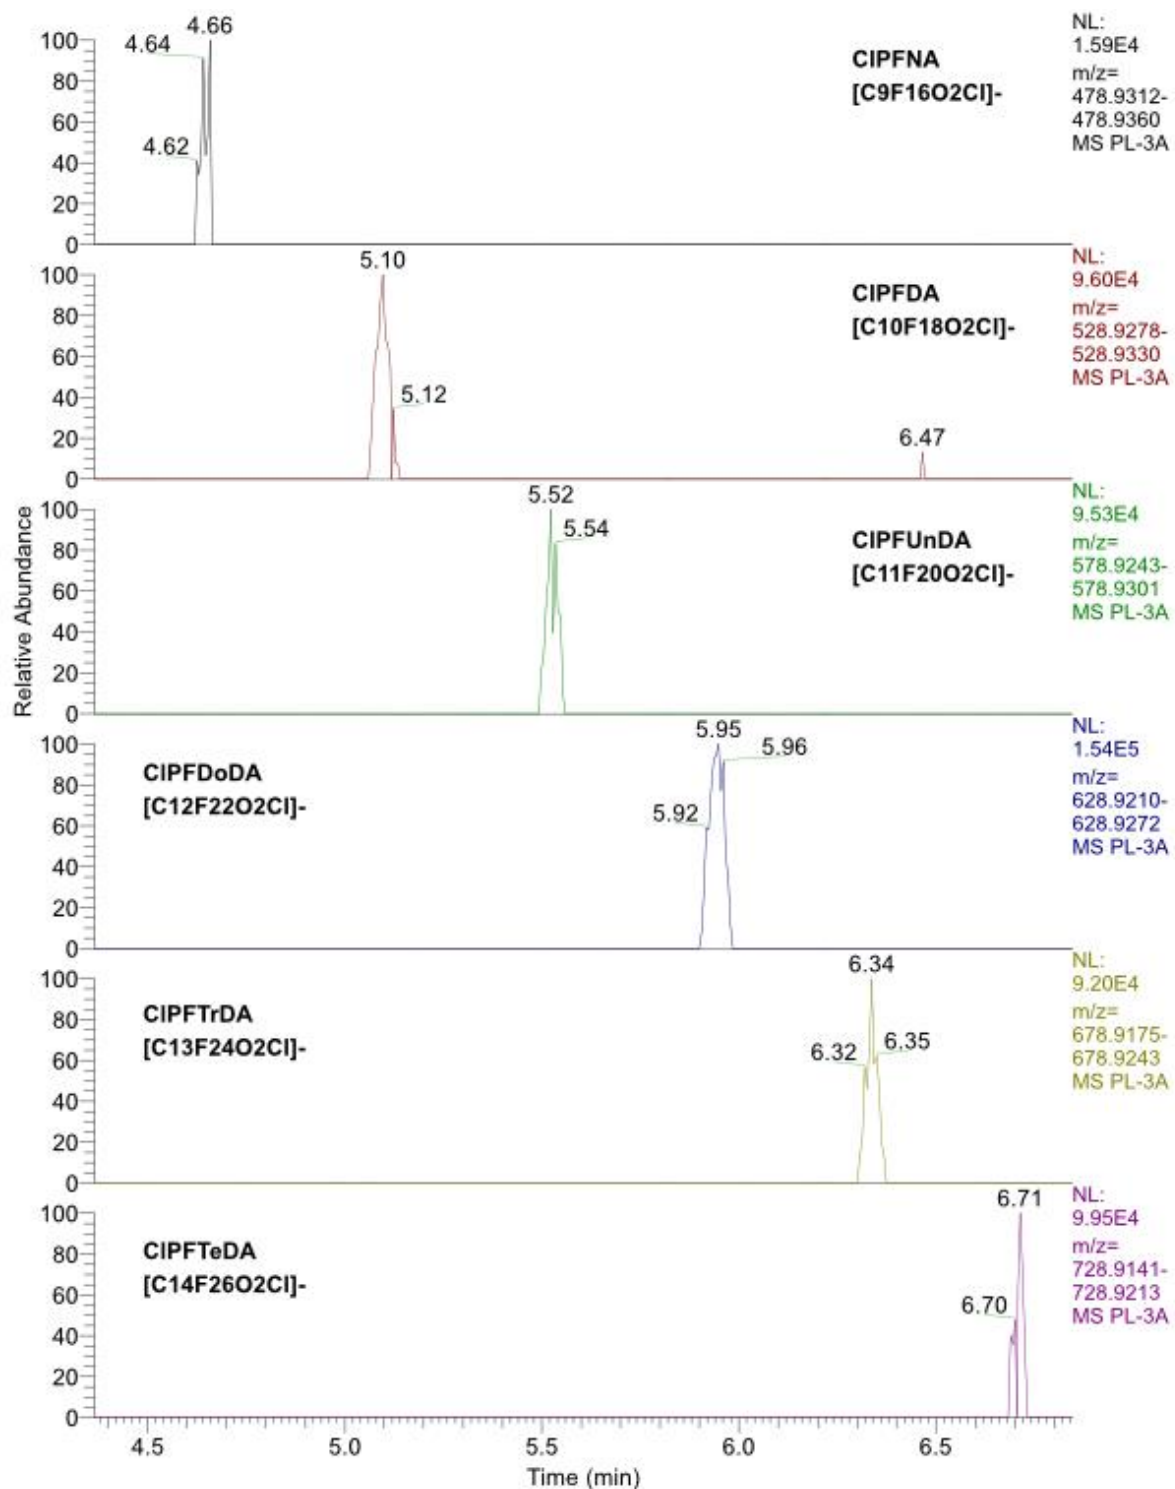

**Figure S12:** Extracted Ion Chromatograms of CI-PFCAs in liver sample of Greenlandic pilot whale (PW3).

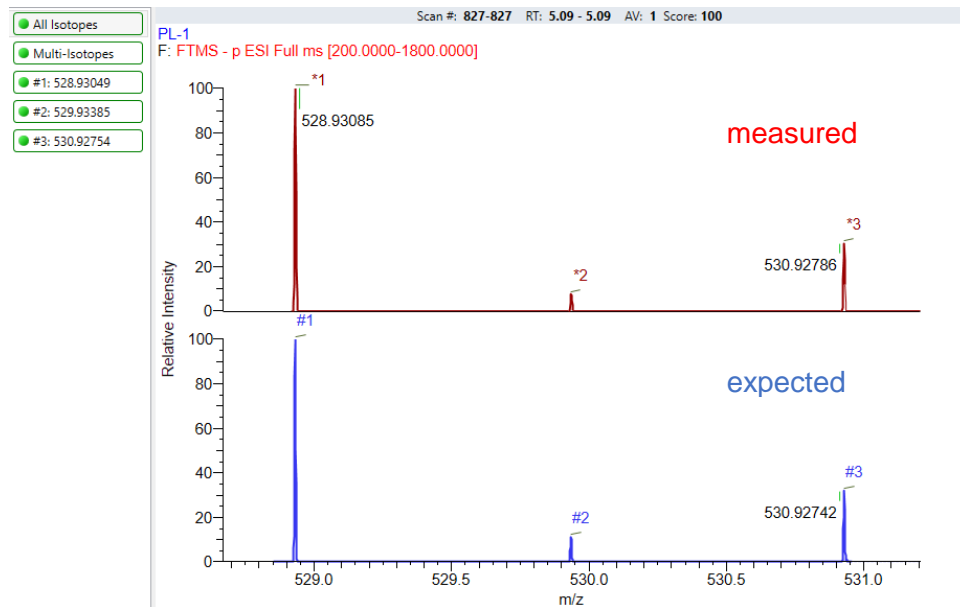

**Figure S13** – Cl-PFNA isotopologues in pilot whale liver sample (PW1). Number 3 represents the <sup>37</sup>Cl-isotopologue.

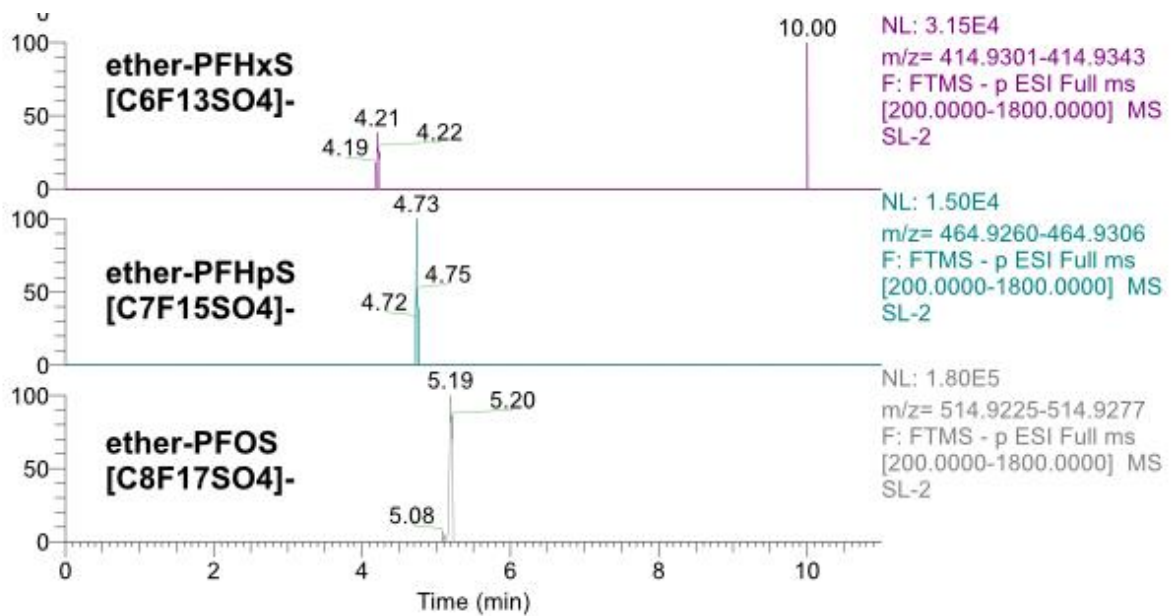

**Figure S14:** Extracted Ion Chromatograms of ether-PFSAs in liver sample of Swedish dolphin (SD2).

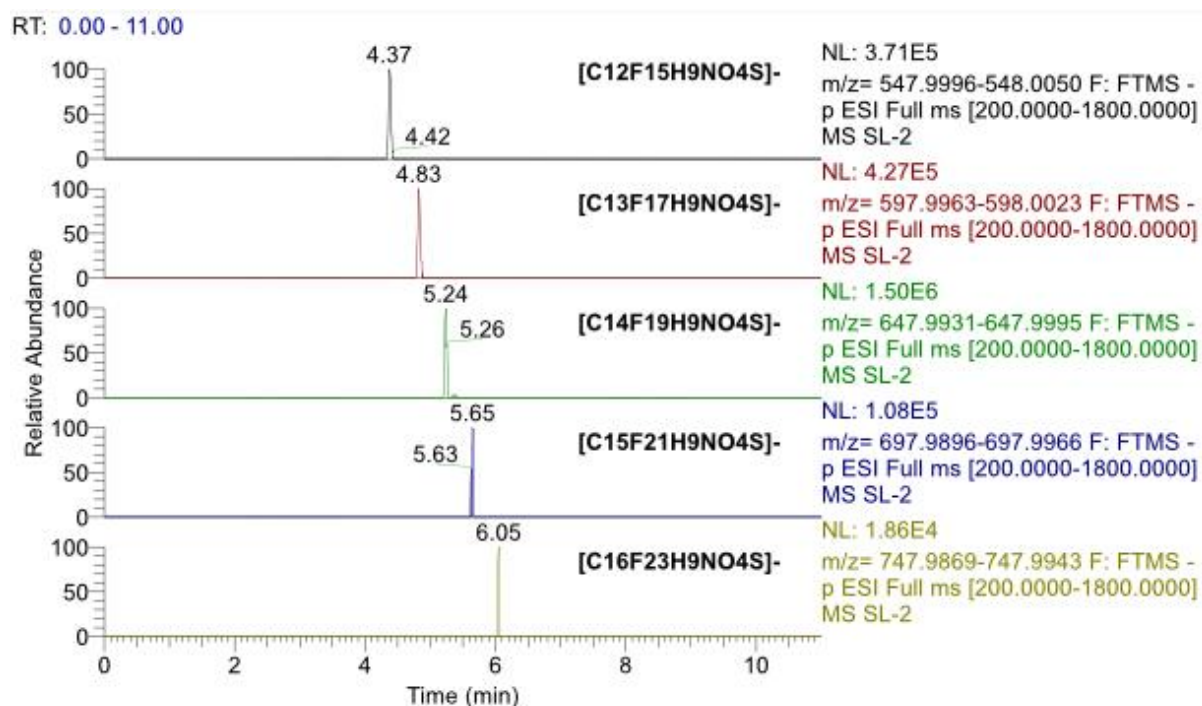

**Figure S15:** Extracted Ion Chromatograms of unknown homologue  $C_nF_{2n-9}H_9NO_4SH$  class in liver sample of Swedish dolphin (SD2).

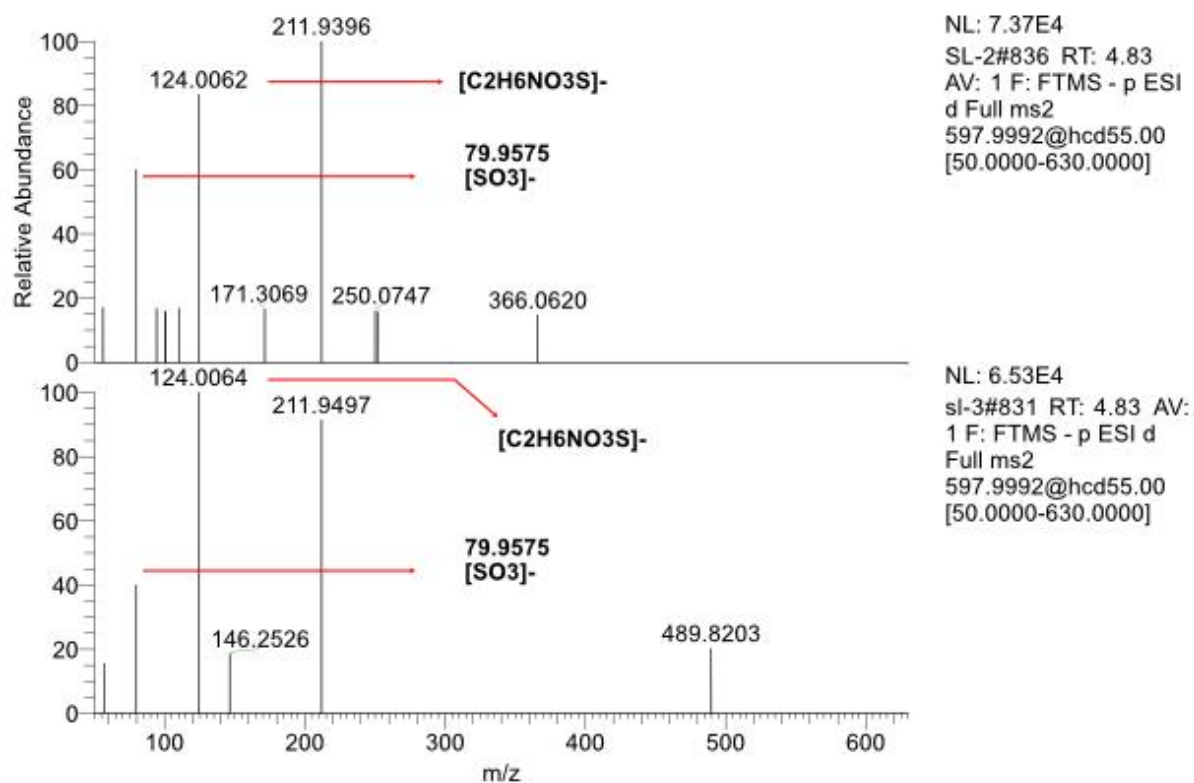

**Figure S16:** MS<sup>2</sup> of [C13F17H9NO4S]- in liver samples of SD2 and SD3.



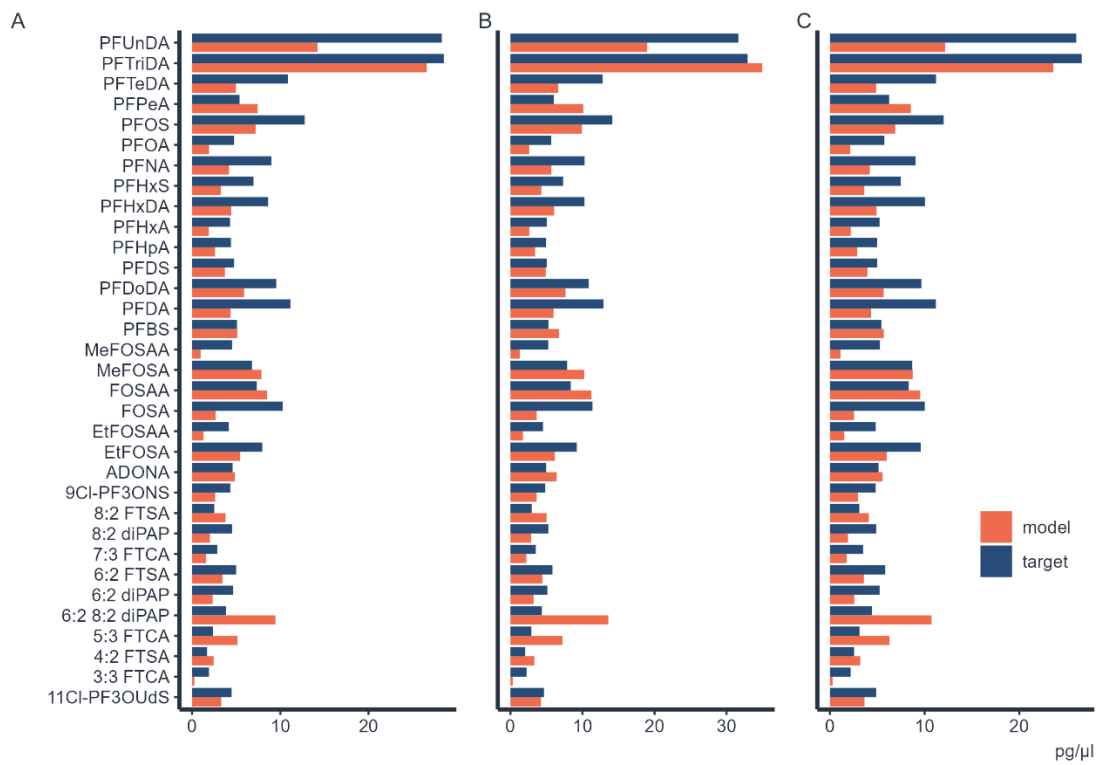

**Figure S17:** Target and model quantification in three spiked liver samples. Concentrations in  $\text{pg}/\mu\text{l}$  in final extract.

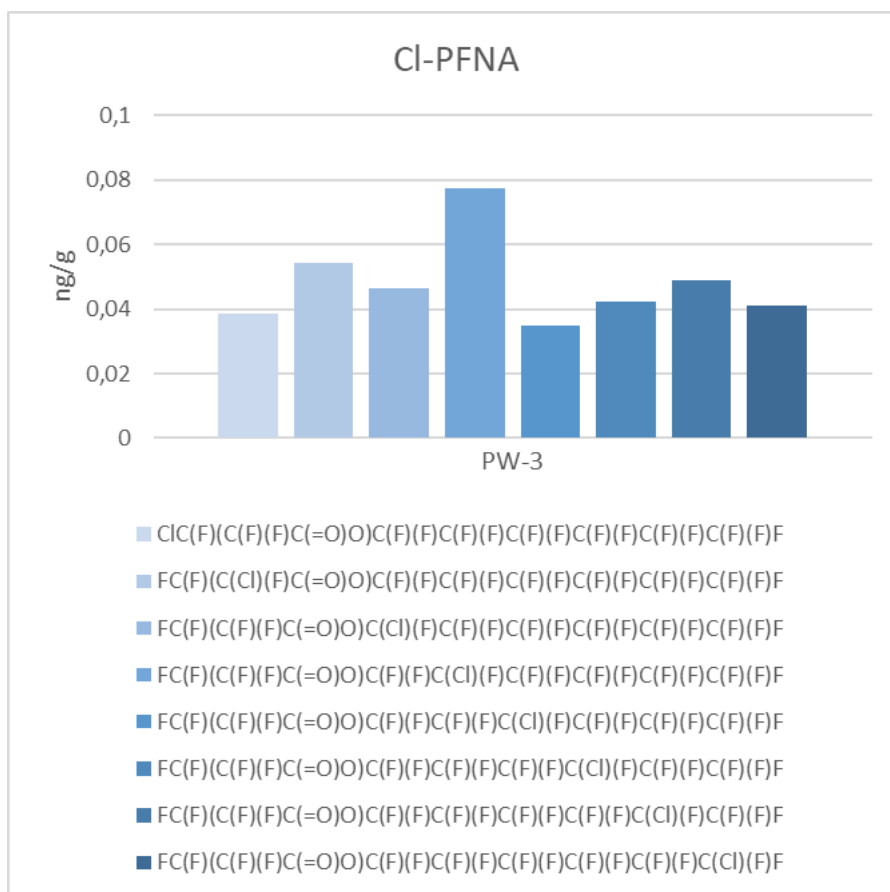

**Figure S18:** Predicted concentration in pg/ul for different isomers of Cl-PFNA, chlorine position from closest to furthest from carboxyl functional group (left to right). Even though there is variability, predicted concentrations stay in the same order of magnitude.

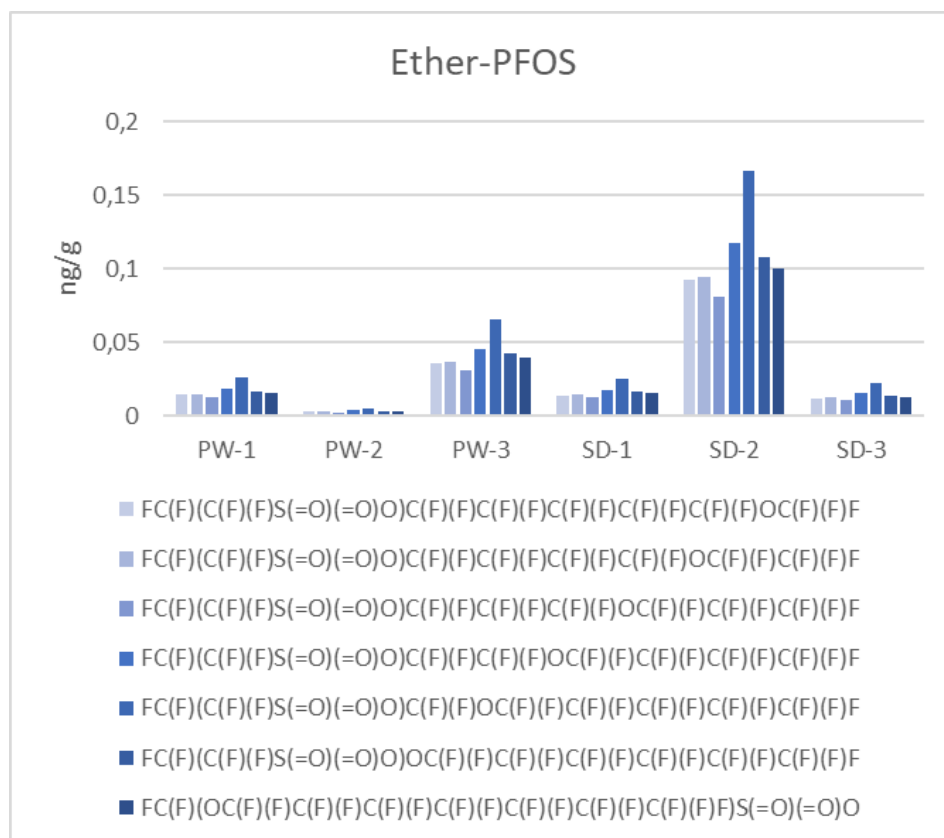

**Figure S19:** Predicted concentration in pg/ul for different isomers of ether-PFOS, ether position from furthest to closest from sulfonic acid functional group (left to right). Even though there is variability, predicted concentrations stay in the same order of magnitude.

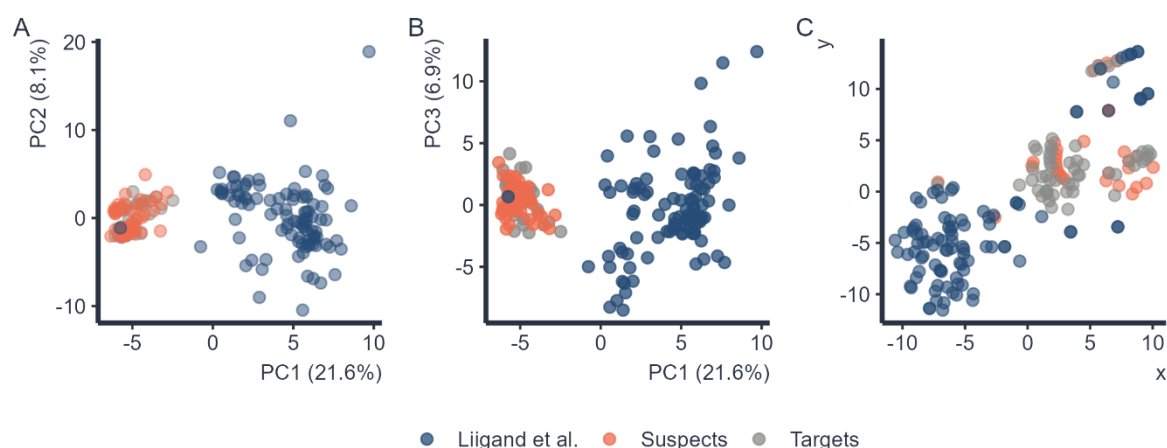

**Figure S20:** Model application domain was visually assessed with principal component analysis (PCA) and *t*-distributed stochastic neighbour embedding (*t*-SNE) analysis to ensure that the suspect chemicals are similar to chemicals used in training. The results for targets, suspects and non-PFAS included in Liigand et al. of A) first and second principal component, B) first and third principal component and C) *t*-SNE analysis confirmed that the targets added to the training set overlapped with the suspects and therefore, the ionization efficiency prediction model is applicable on suspect PFAS.
